# Supplementary material
Source: PubMed Central journal article supplement (PMC544300)
Supplement: pnas_102_2_273__10.pdf [file pnas_102_2_273__10.pdf]

**Table 4. Selected active site and metal ligand distances**

|                                   |                        | Distance, Å |           |          |
|-----------------------------------|------------------------|-------------|-----------|----------|
|                                   |                        | Subunit A   | Subunit B | Average* |
| Fe <sup>III</sup>                 | Mn <sup>II</sup>       | 3.24        | 3.29      | 3.26     |
| Fe <sup>III</sup>                 | Asp 163 Oδ2            | 2.24        | 2.23      | 2.23     |
|                                   | Asp 134 Oδ2            | 2.36        | 2.34      | 2.35     |
|                                   | Tyr 166 O <sup>-</sup> | 1.85        | 1.90      | 1.88     |
|                                   | His 324 Nε2            | 2.69        | 2.69      | 2.69     |
|                                   | PO <sub>4</sub> O3     | 2.18        | 2.81      | –        |
|                                   | PO <sub>4</sub> O1     | 2.59        | 1.85      | –        |
|                                   | Mn <sup>II</sup>       | Asp 163 Oδ2 | 2.21      | 2.32     |
| Asn 200 Oδ1                       |                        | 2.11        | 2.07      | 2.09     |
| His 285 Nε2                       |                        | 2.16        | 2.10      | 2.13     |
| His 322 Nδ1                       |                        | 2.15        | 2.05      | 2.10     |
| PO <sub>4</sub> O2                |                        | 2.69        | 2.03      | –        |
| PO <sub>4</sub> O3                |                        | 2.51        | 3.22      | –        |
| PO <sub>4</sub> (O1)              |                        | His 201 Nε2 | 2.81      | 2.98     |
|                                   | Glu 365 Oε2            | 2.83        | 3.53      | –        |
| PO <sub>4</sub> (O <sub>2</sub> ) | Asn 200 Nδ2            | 2.67        | 2.71      | 2.69     |
| PO <sub>4</sub> (O <sub>3</sub> ) | His 322 O              | 2.56        | 2.37      | 2.47     |
|                                   | His 295 Nε2            | 3.96        | 3.19      | –        |
| PO <sub>4</sub> (O <sub>4</sub> ) | Glu 365 Oε2            | 3.31        | 2.97      | 3.17     |
|                                   | His 295 Nε2            | 2.77        | 3.74      | –        |

\*No average was calculated if the difference in distances was >0.5 Å.
