# Supplementary material
Source: PubMed Central journal article supplement (PMC544300)
Supplement: pnas_102_2_273__11.pdf [file pnas_102_2_273__11.pdf]

**Table 3. Effect of leaving group pK<sub>a</sub> on *k*<sub>cat</sub>, *K*<sub>m</sub>, and *k*<sub>cat</sub>/*K*<sub>m</sub> of sweet potato, red kidney bean, and pig PAP**

| Substrate               | pK <sub>a</sub> | Sweet potato PAP*                         |                            |                                                                                     | Red kidney bean PAP <sup>†</sup>          |                            |                                                                                     | Pig PAP <sup>‡</sup>                      |                            |                                                                                     |
|-------------------------|-----------------|-------------------------------------------|----------------------------|-------------------------------------------------------------------------------------|-------------------------------------------|----------------------------|-------------------------------------------------------------------------------------|-------------------------------------------|----------------------------|-------------------------------------------------------------------------------------|
|                         |                 | <i>k</i> <sub>cat</sub> , s <sup>-1</sup> | <i>K</i> <sub>m</sub> , mM | <i>k</i> <sub>cat</sub> / <i>K</i> <sub>m</sub> , mM <sup>-1</sup> •s <sup>-1</sup> | <i>k</i> <sub>cat</sub> , s <sup>-1</sup> | <i>K</i> <sub>m</sub> , mM | <i>k</i> <sub>cat</sub> / <i>K</i> <sub>m</sub> , mM <sup>-1</sup> •s <sup>-1</sup> | <i>k</i> <sub>cat</sub> , s <sup>-1</sup> | <i>K</i> <sub>m</sub> , mM | <i>k</i> <sub>cat</sub> / <i>K</i> <sub>m</sub> , mM <sup>-1</sup> •s <sup>-1</sup> |
| Leaving group           |                 |                                           |                            |                                                                                     |                                           |                            |                                                                                     |                                           |                            |                                                                                     |
| 4-Nitrophenyl           | 7.14            | 2,100 ± 140                               | 0.08 ± 0.01                | 25,000 <sup>b</sup>                                                                 | 850 ± 30                                  | 2.20 ± 0.15                | 390                                                                                 | 470 ± 40                                  | 1.25 ± 0.25                | 380 <sup>b</sup>                                                                    |
| 3-Nitrophenyl           | 8.23            | 890 ± 40                                  | 0.70 ± 0.09                | 1,300                                                                               | 300 ± 19                                  | 1.10 ± 0.1                 | 280                                                                                 | 440 ± 20                                  | 1.40 ± 0.26                | 310                                                                                 |
| 3-Chlorophenyl          | 9.08            | 890 ± 45                                  | 0.53 ± 0.07                | 1,700                                                                               | 100 ± 5                                   | 0.20 ± 0.04                | 490                                                                                 | 340 ± 31                                  | 2.56 ± 0.60                | 130                                                                                 |
| α-Naphthyl              | 9.24            | 450 ± 30                                  | 0.09 ± 0.01                | 5,100                                                                               | 63 ± 6                                    | 0.80 ± 0.05                | 79                                                                                  | 130 ± 15                                  | 3.60 ± 0.40                | 38                                                                                  |
| β-Naphthyl              | 9.24            | 1,800 ± 130                               | 0.11 ± 0.01                | 17,000                                                                              | 48 ± 6                                    | 0.65 ± 0.10                | 75                                                                                  | 230 ± 30                                  | 2.00 ± 0.40                | 110                                                                                 |
| Phenyl                  | 9.99            | 1,980 ± 140                               | 0.09 ± 0.01                | 21,000                                                                              | 85 ± 5                                    | 0.55 ± 0.05                | 86                                                                                  | 230 ± 20                                  | 5.80 ± 0.70                | 39                                                                                  |
| Phosphotyrosine         | 10.04           | 1,700 ± 190                               | 0.29 ± 0.05                | 5,900                                                                               | 24 ± 7                                    | 0.30 ± 0.10                | 87                                                                                  | 280 ± 15                                  | 5.20 ± 0.40                | 52                                                                                  |
| Benzyl                  | 14.75           | 3,200 ± 300                               | 0.40 ± 0.05                | 8,100                                                                               | –                                         | –                          | <0.07 <sup>§</sup>                                                                  | 4.20 ± 0.3                                | 1.74 ± 0.50                | 2.44                                                                                |
| β-Glyceryl <sup>§</sup> | 15.44           | 3,700 ± 550                               | 0.53 ± 0.11                | 6,900                                                                               | –                                         | –                          | <0.01 <sup>§</sup>                                                                  | -                                         |                            | <0.08 <sup>¶</sup>                                                                  |

\*[*E*]<sub>0</sub> = 1 nM.

<sup>†</sup>[*E*]<sub>0</sub> = 55 nM.

<sup>‡</sup>[*E*]<sub>0</sub> = 25 nM.

<sup>§</sup>These numbers were calculated by using the minimum detectable released phosphate in the assay, at an enzyme concentration of [*E*]<sub>0</sub> = 120 nM and maximum substrate concentration of 40 mM.

<sup>¶</sup>The value was calculated from the minimum amount of phosphate detectable in the assay, [*E*]<sub>0</sub> = 55 nM, and the maximum substrate concentration in the assay, 100 mM.
