# Supplementary material
Source: PubMed Central journal article supplement (PMC544300)
Supplement: pnas_102_2_273__12.pdf [file pnas_102_2_273__12.pdf]

**Table 2. Data collection and refinement statistics for the sweet potato PAP–phosphate complex**

| Data collection                                |                               |
|------------------------------------------------|-------------------------------|
| Temperature, K                                 | 100                           |
| Unit cell length, Å                            | $a = b = 116.15$ $c = 291.95$ |
| Space group                                    | $P6_522$                      |
| Crystal mosaicity, °                           | 0.42                          |
| Resolution range, Å                            | 50.0–2.50                     |
| Total observations, $I > 0\sigma(I)$           | 222,880                       |
| Unique measurements, $I > 0\sigma(I)$          | 37,188                        |
| Completeness,* %                               | 90.0 (56.5)                   |
| $R_{\text{sym}}, *^{\dagger}$ %                | 0.067 (0.310)                 |
| $I/\sigma(I)^*$                                | 11.0 (3.0)                    |
| Dimers per asymmetric unit                     | 1                             |
| Solvent content, %                             | 54                            |
| Refinement                                     |                               |
| Resolution range, Å                            | 50.0–2.50                     |
| $R$ factor, $^{\ddagger}$ $F > 1\sigma(F)$     | 0.238                         |
| $R_{\text{free}},^{\ddagger}$ $F > 1\sigma(F)$ | 0.264                         |
| rms deviations from ideal                      |                               |
| Bond length, Å                                 | 0.007                         |
| Bond angle, °                                  | 1.37                          |
| Average B factor, Å <sup>2</sup>               | 45.0                          |
| Ramachandran plot statistics (%)               |                               |
| Residues in most favoured regions              | 83.4                          |
| Residues in disallowed regions                 | 0.5 (2 from each subunit)     |

\*Values in parentheses are for the outer shell of data 2.60–2.50 Å.

$$^{\dagger}R_{\text{sym}} = \frac{\sum |I - \langle I \rangle|}{\sum \langle I \rangle}$$

$^{\ddagger}R$  factor =  $\frac{\sum ||F_{\text{obs}}| - |F_{\text{calc}}||}{\sum |F_{\text{obs}}|}$ , where the  $R$  factor is calculated based on the reflections used in the refinement (90% of the total data), and  $R_{\text{free}}$  [Brünger, A. T. (1992)]

*X-PLO*R: *A System for X-ray Crystallography and NMR* (Yale Univ. Press, New Haven, CT)] is calculated using the remaining 10% of the data.
