# Supplementary material
Source: PubMed Central journal article supplement (PMC544300)

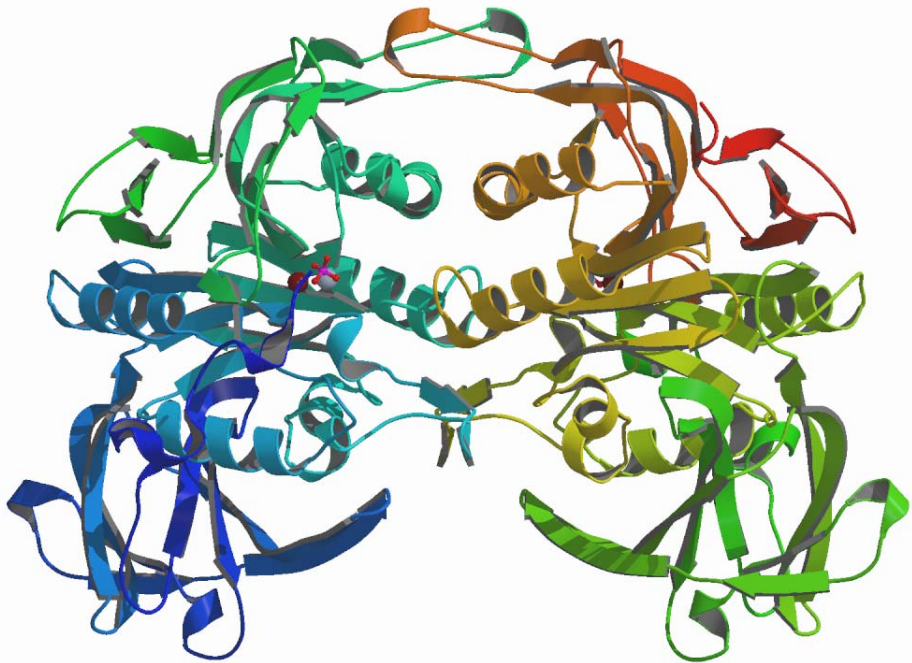

Supplement: pnas_102_2_273__4.pdf [file pnas_102_2_273__4.pdf]

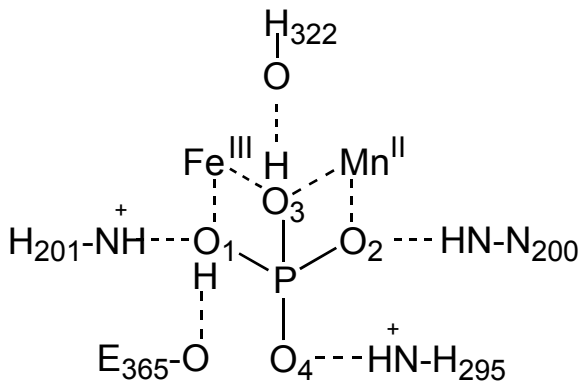

Subunit A

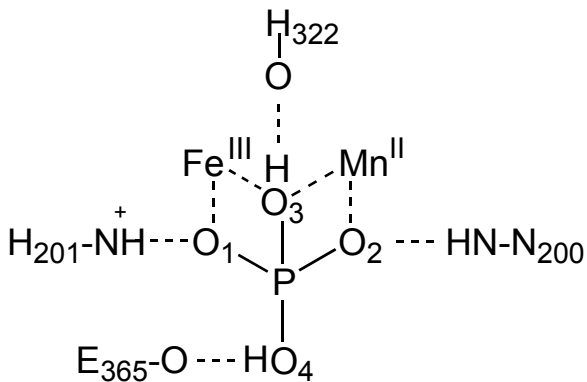

Subunit B

Supplement: pnas_102_2_273__5.pdf [file pnas_102_2_273__5.pdf]

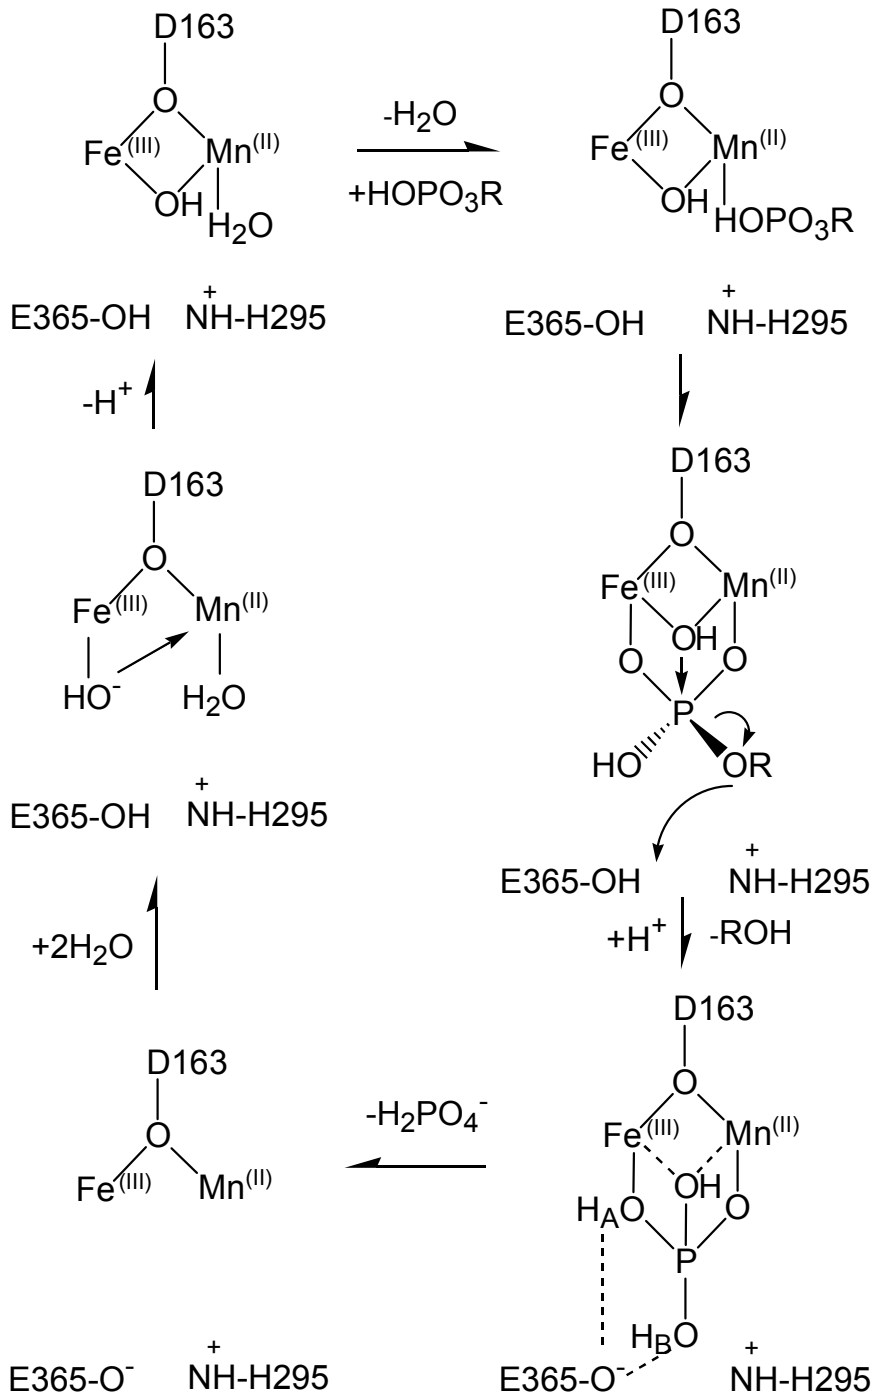

Supplement: pnas_102_2_273__7.pdf [file pnas_102_2_273__7.pdf]
